# Supplementary material for: Kinetics and mechanism of oxygen reduction in a protic ionic liquid
Source: Royal Society of Chemistry journal article supplement (doi:10.1039/c3cp44669g), 2013-01-01
Supplement: c3cp44669g.pdf [file c3cp44669g.pdf]

## Kinetics and Mechanism of the Oxygen Reduction Reaction in a Protic Ionic Liquid

Darren A. Walsh\*, Andinet Ejigu, Joshua Smith, Peter Licence

School of Chemistry, The University of Nottingham, Nottingham NG7 2RD, UK

\*darren.walsh@nottingham.ac.uk

Tel: 0044 115 9513437; Fax: 0044 115 9513562

### Electronic Supplementary Information

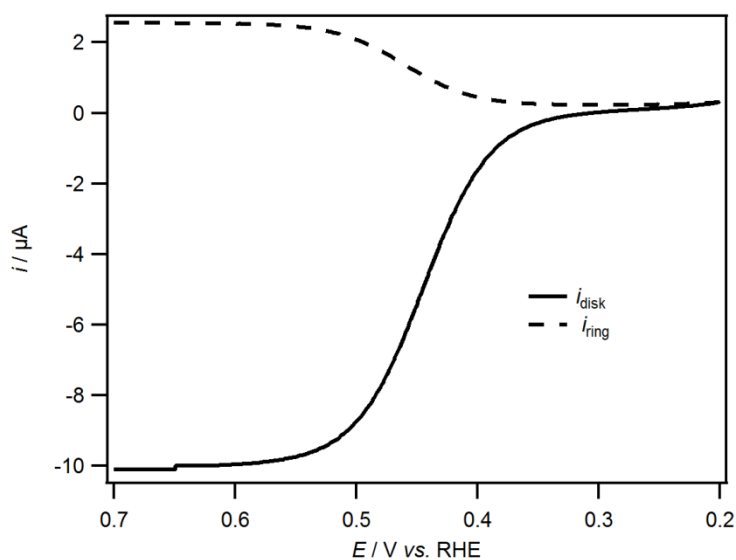

**Figure S1.** A rotating ring-disk electrode voltammogram obtained at Pt/Pt ring-disk assembly in 5 mM ferrocenemethanol in 1-butyl-3-methylimidazolium bis[(trifluoromethane)sulfonyl]imide at 1600 rpm at 50 °C. The disk potential was scanned from 0.7 V to 0.2 V at 10 mV s<sup>-1</sup> and the ring potential was 0.2 V. The calculated collection efficiency at the ring is 25 %.

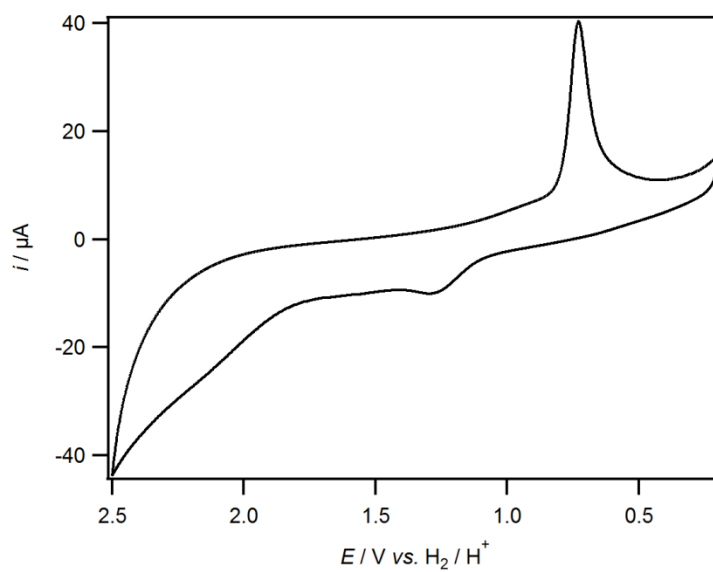

**Figure S2.** Cyclic voltammogram recorded at a 2 mm diameter Pt electrode in Ar-saturated [dema][TfO]. The potential was scanned between 2.5 V and 0.2 V from an initial potential of 0.2 V at a scan rate of 50 mV s<sup>-1</sup>. The cell temperature was 60 °C.
